# Supplementary material
Source: PubMed Central journal article supplement (PMC5710476)

## Supplementary Online Content

Plawecki A, Bobian M, Kandinov A, et al. Recreational activity and facial trauma among older adults. *JAMA Facial Plast Surg*. Published online June 15, 2017. doi:10.1001/jamafacial.2017.0332

**eFigure.** Mean Age of Injury by Specific Activity

This supplementary material has been provided by the authors to give readers additional information about their work.

**eFigure.** Mean Age of Injury by Specific Activity

Team = team sports, Ind = individual sports, W/J = walking/jogging, Dog = Dog walking, Veh = recreational vehicle use.

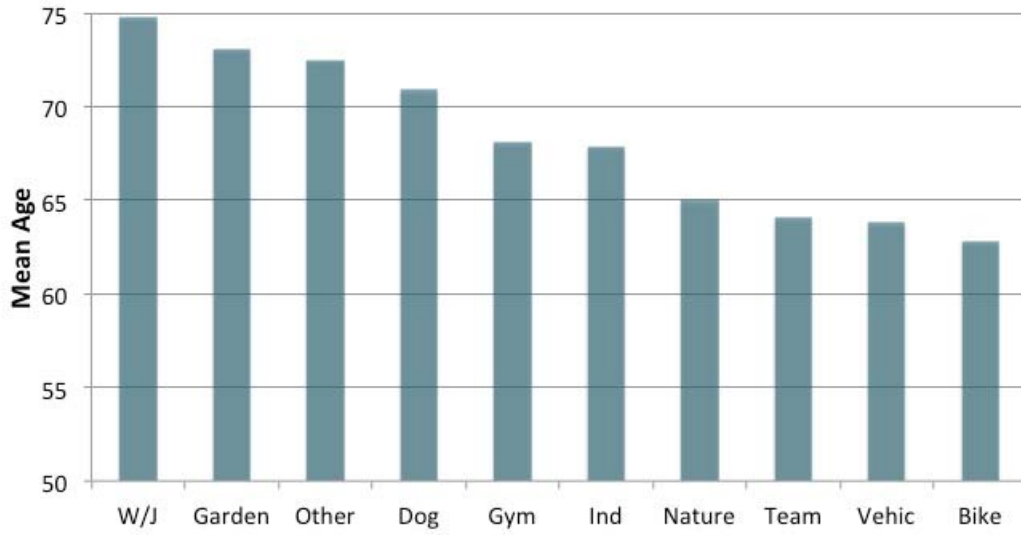

Supplement: jamafacialplastsurg-19-453-s001.pdf [file jamafacialplastsurg-19-453-s001.pdf]
